# Supplementary material
Source: HighWire-hosted journal article supplement (http://erj.ersjournals.com/highwire/filestream/121075/field_highwire_adjunct_files/1/ERJ-02316-2014_Supplementary_tables.pdf)
Supplement: ERJ-02316-2014_Supplementary_tables.pdf [file ERJ-02316-2014_Supplementary_tables.pdf]

**Supplementary Tables**

**Supplementary Table S1. Prevalence of COPD among IPF Patients**

| <b>Reference</b>   | <b>Country</b> | <b>Study Period</b> | <b>Sample Size</b> | <b>Study Population</b>                                  | <b>IPF Diagnostic Criteria</b>                                                                                                                                                                                                                                                 | <b>COPD/<br/>emphysema<br/>Case<br/>Ascertainment</b>         | <b>Prevalence (%)</b> |
|--------------------|----------------|---------------------|--------------------|----------------------------------------------------------|--------------------------------------------------------------------------------------------------------------------------------------------------------------------------------------------------------------------------------------------------------------------------------|---------------------------------------------------------------|-----------------------|
| Collard<br>HR[26]  | US             | 2001–<br>2008       | 9,286              | IPF patients<br>identified from 2 US<br>claims databases | ICD-9 codes                                                                                                                                                                                                                                                                    | Emphysema<br>(ICD-9 codes)                                    | 8                     |
| Munson<br>JC[23]   | UK             | 1989–<br>2006       | 1,126              | IPF patients<br>identified from the<br>THIN database     | Read codes                                                                                                                                                                                                                                                                     | Asthma or<br>COPD (ICD-9<br>codes predating<br>IPF diagnosis) | 19                    |
| Kurashima<br>K[36] | Japan          | 1997–<br>2006       | 660                | IPF patients from a<br>respiratory clinic                | Presence<br>of reticular<br>abnormalities<br>and traction<br>bronchiectasis<br>with basal and<br>peripheral<br>predominance;<br>presence of<br>honeycombing<br>with basal and<br>peripheral<br>predominance;<br>and absence of<br>atypical<br>features (e.g.,<br>micronodules, | Emphysema<br>(CT scan)                                        | 34                    |

| Reference                      | Country | Study Period  | Sample Size | Study Population                                                                            | IPF Diagnostic Criteria                                                                   | COPD/<br>emphysema<br>Case<br>Ascertainment            | Prevalence (%)                                                           |
|--------------------------------|---------|---------------|-------------|---------------------------------------------------------------------------------------------|-------------------------------------------------------------------------------------------|--------------------------------------------------------|--------------------------------------------------------------------------|
|                                |         |               |             |                                                                                             | consolidation,<br>non-honeycomb<br>cysts or<br>extensive<br>ground glass<br>attenuation). |                                                        |                                                                          |
| Ryerson<br>CJ[32] <sup>c</sup> | US      | 2000–<br>2010 | 365         | IPF patients from the<br>UCSF longitudinal<br>and Mayo Clinic<br>Rochester ILD<br>databases | ATS/ERS/JRS/<br>ALAT                                                                      | Emphysema<br>(CT scan)                                 | 29                                                                       |
|                                |         |               |             |                                                                                             |                                                                                           | >10%<br>Emphysema                                      | 8                                                                        |
| Ryerson<br>CJ[27] <sup>c</sup> | US      | 2000–<br>2010 | 242         | IPF patients from the<br>UCSF longitudinal<br>ILD database                                  | ATS/ERS                                                                                   | COPD (patient<br>questionnaire<br>and chart<br>review) | 29                                                                       |
| Wells<br>AU[22]                | UK      | 1990–<br>1996 | 212         | Consecutive patients<br>presenting with a<br>clinical diagnosis of<br>IPF                   | ATS/ERS                                                                                   | Emphysema<br>(CT scan)                                 | 36<br>(median<br>extent of<br>emphysema:<br>10.5%<br>(range, 1–<br>69%). |

| Reference       | Country | Study Period | Sample Size | Study Population                                                                                                                                   | IPF Diagnostic Criteria | COPD/<br>emphysema<br>Case<br>Ascertainment | Prevalence (%) |
|-----------------|---------|--------------|-------------|----------------------------------------------------------------------------------------------------------------------------------------------------|-------------------------|---------------------------------------------|----------------|
| Cai M[37]       | China   | 1999 – 2007  | 210         | IPF patients identified from the database of Beijing Institute of Respiratory Medicine Interstitial Lung Disease Group, Beijing Chao-Yang Hospital | ATS/ERS                 | Emphysema (CT scan)                         | 42             |
| Antoniou KM[24] | UK      | 1991– 1999   | 186         | Review of consecutive IPF patients from an interstitial lung unit who were current or former smokers                                               | ATS/ERS                 | Emphysema (CT scan)                         | 35             |
| Schmidt SL[30]  | US      | 1995– 2007   | 169         | IPF patients from the University of Michigan ILD database                                                                                          | ATS/ERS                 | Emphysema (CT scan)                         | 47–51          |
|                 |         |              |             |                                                                                                                                                    |                         | Moderate-to-severe                          | 25–27          |
| Mejia M[6]      | Mexico  | 1996– 2006   | 110         | Clinical records of consecutive IPF patients at the National Institute of Respiratory Diseases, Mexico                                             | ATS/ERS                 | ≥10%<br>Emphysema (CT scan)                 | 28             |

| Reference              | Country | Study Period | Sample Size | Study Population                                                                         | IPF Diagnostic Criteria | COPD/<br>emphysema<br>Case<br>Ascertainment                            | Prevalence (%)                 |    |
|------------------------|---------|--------------|-------------|------------------------------------------------------------------------------------------|-------------------------|------------------------------------------------------------------------|--------------------------------|----|
| Sugino K[38]           | Japan   | 2003–2010    | 108         | Medical records of Consecutive IPF patients admitted to a single hospital                | ATS/ERS                 | Emphysema (CT scan)                                                    | 43                             |    |
| Hwang J-H[29]          | US      | 1998–2006    | 97          | Review of data from single center, IPF patients who had CT scans available were included | ATS/ERS                 | Emphysema (CT scan)                                                    | 36                             |    |
| Araki T[34]            | Japan   | 1978–1997    | 86          | Consecutive autopsy series of IPF patients >65 years                                     | ATS/ERS                 | Emphysema (greater than moderate severity in macroscopic observations) | 65                             |    |
| Kim Y[35] <sup>a</sup> | Korea   | 2006–2010    | 81          | Medical records of patients with IPF/NSIP <sup>b</sup>                                   | NR                      | Emphysema (CT scan)                                                    | 40                             |    |
| Mura M[19]             | Italy   | 2005–2007    | 70          | Patients with newly diagnosed IPF                                                        | ATS/ERS                 | Emphysema (NR)                                                         | based on newly collected data: | 34 |

| Reference              | Country | Study Period | Sample Size | Study Population                                                                   | IPF Diagnostic Criteria                                                                                                                   | COPD/emphysema Case Ascertainment                                     | Prevalence (%)          |    |
|------------------------|---------|--------------|-------------|------------------------------------------------------------------------------------|-------------------------------------------------------------------------------------------------------------------------------------------|-----------------------------------------------------------------------|-------------------------|----|
|                        |         |              | 68          | Retrospective (validation) study: IPF patients from the University of Siena, Italy |                                                                                                                                           |                                                                       | based on existing data: | 19 |
| Bodlet A[25]           | Belgium | 1981 - 2011  | 56          | medical files IPF patients at single university hospital                           | ATS/ERS/JRS/ALAT                                                                                                                          | Radiological emphysema (CT scan; Schmidt et al.'s HRCT scan criteria) | 38                      |    |
| Doherty MJ[20]         | UK      | 1992–1995    | 48          | Medical records of IPF patients                                                    | Fine basal inspiratory crackles with or without clubbing, a reduced TLCO, and a chest radiograph suggesting diffuse interstitial fibrosis | Emphysema (CT scan)                                                   | 19                      |    |
| Fernandez Perez ER[28] | US      | 1997–2005    | 47          | Population-based sample of adult patients with IPF in Olmsted County,              | ATS/ERS                                                                                                                                   | COPD (ICD-9 codes)                                                    | 28                      |    |

| Reference                  | Country | Study Period  | Sample Size            | Study Population                                                                                                                                                                          | IPF Diagnostic Criteria                                                                                                               | COPD/<br>emphysema<br>Case<br>Ascertainment | Prevalence (%) |    |
|----------------------------|---------|---------------|------------------------|-------------------------------------------------------------------------------------------------------------------------------------------------------------------------------------------|---------------------------------------------------------------------------------------------------------------------------------------|---------------------------------------------|----------------|----|
|                            |         |               |                        | Minn.                                                                                                                                                                                     |                                                                                                                                       |                                             |                |    |
| Desai<br>SR[21]            | UK      | 1991–<br>1999 | 40                     | Consecutive IPF<br>patients                                                                                                                                                               | ATS/ERS                                                                                                                               | Emphysema<br>(CT scan)                      | 12             |    |
|                            |         |               |                        |                                                                                                                                                                                           |                                                                                                                                       | >10%<br>emphysema                           | 0              |    |
| Simon-<br>Blancal<br>V[18] | France  | 2002–<br>2009 | survivors:<br>n=27;    | Medical records of<br>all IPF patients who<br>experienced an AE<br>and were hospitalized                                                                                                  | ATS/ERS                                                                                                                               | Emphysema<br>(NR)                           | Total          | 51 |
|                            |         |               | non-survivors:<br>n=10 |                                                                                                                                                                                           |                                                                                                                                       |                                             | Survivors      | 48 |
|                            |         |               |                        |                                                                                                                                                                                           |                                                                                                                                       |                                             | Non-survivors  | 60 |
| Rufino<br>RL*[39]          | Brazil  | 2008–<br>2010 | 36                     | IPF patients referred<br>to an outpatient clinic                                                                                                                                          | ATS/ERS                                                                                                                               | COPD (NR)                                   | 6              |    |
| Akagi<br>T[33]             | Japan   | 1988–<br>2007 | 33                     | Hospital medical files<br>of all patients                                                                                                                                                 | ATS/ERS                                                                                                                               | Emphysema<br>(CT scan)                      | 44             |    |
| Aduen<br>JF[31]            | US      | 1990–<br>2000 | 9                      | Review based on<br>existing data of the<br>pulmonary function<br>database at the Mayo<br>Clinic in<br>Jacksonville, Fla.;<br>medical record was<br>reviewed. IPF<br>patients with reduced | Exclusion of<br>other known<br>causes of ILD;<br>bibasilar<br>reticular<br>abnormalities<br>with minimal<br>ground-glass<br>opacities | Emphysema<br>(CT scan)                      | 67             |    |

| Reference | Country | Study Period | Sample Size | Study Population                                                                                | IPF Diagnostic Criteria                                                                                       | COPD/emphysema Case Ascertainment | Prevalence (%) |
|-----------|---------|--------------|-------------|-------------------------------------------------------------------------------------------------|---------------------------------------------------------------------------------------------------------------|-----------------------------------|----------------|
|           |         |              |             | DLCO who had undergone chest CT and echocardiography within 1 month of their PFT were included. | on HRCT; subpleural honeycombing on HRCT; diagnostic lung biopsy showing usual interstitial pneumonia pattern |                                   |                |

<sup>a</sup> abstract

<sup>b</sup> abstract only, does not report number of patients with IPF vs. NSIP

<sup>c</sup> These studies likely have some overlap in patient samples

\*of the 38%, it was predominant in the lung apex: 62%; basal: 14%; lateralized: 5%; diffuse: 4%

Abbreviations: AE: Acute exacerbation; ALAT: Latin-American Thoracic Society; CT: computed tomography; DLCO: diffusing capacity of lung for carbon monoxide; FEV<sub>1</sub>: Forced expiratory volume in one second; FVC: Forced vital capacity; ILD: Interstitial lung disease; JRS: Japanese Respiratory Society; NSIP: Non-specific interstitial pneumonia; NR: Not reported; PFT: Pulmonary function testing; THIN: The Health Improvement Network; TLCO: transfer factor for carbon monoxide; UCSF: University of California, San Francisco

**Supplementary Table S2. Prevalence of Pulmonary Hypertension among IPF Patients**

| Reference                  | Country | Study Period | Sample Size | Study Population                                                                                                                                   | IPF Diagnostic Criteria | PH Case Ascertainment                 | Prevalence (%) |
|----------------------------|---------|--------------|-------------|----------------------------------------------------------------------------------------------------------------------------------------------------|-------------------------|---------------------------------------|----------------|
| Collard HR[26]             | US      | 2001–2008    | 9,286       | Patients identified from 2 claims databases                                                                                                        | ICD-9 codes             | ICD-9 codes                           | 3              |
| Shorr AF[61]               | US      | 1995–2004    | 2,525       | IPF patients from the UNOS database                                                                                                                | NR                      | PH<br>mPAP >25 mmHg (from RHC)        | 46             |
|                            |         |              |             |                                                                                                                                                    |                         | Severe PH<br>mPAP ≥40 mmHg (from RHC) | 9              |
| Mathai SC[56] <sup>a</sup> | US      | 1998–2008    | 1,848       | IPF patients who RHC and lung transplantation were identified using the UNOS database                                                              | NR                      | mPAP >25 mmHg (from RHC)              | 33             |
| Lederer DJ[52]             | US      | 2004–2005    | 376         | IPF patients from the UNOS database                                                                                                                | NR                      | mPAP >25 mmHg (from RHC)              | 36             |
| Cai M[37]                  | China   | 1999–2007    | 210         | IPF patients identified from the database of Beijing Institute of Respiratory Medicine Interstitial Lung Disease Group, Beijing Chao-Yang Hospital | ATS/ERS                 | sPAP: ≥37 mmHg                        | 29             |
| Tomassetti                 | Italy   | 2002–        | Not on      | Patients evaluated at                                                                                                                              | ATS/ERS                 | NR                                    | Not on         |



| Reference            | Country      | Study Period | Sample Size                                | Study Population                                                                   | IPF Diagnostic Criteria | PH Case Ascertainment                                                  | Prevalence (%)                            |
|----------------------|--------------|--------------|--------------------------------------------|------------------------------------------------------------------------------------|-------------------------|------------------------------------------------------------------------|-------------------------------------------|
| S[43] <sup>a</sup>   |              | 2009         | anticoagulants: 147; on anticoagulants: 35 | an Italian IPF clinic <sup>b</sup>                                                 |                         |                                                                        | anticoagulants: 36; on anticoagulants: 51 |
| Papakosta D[41]      | Greece       | 2005–2006    | 139                                        | Patients with IPF referred to 8 departments of pneumonology                        | ATS/ERS                 | sPAP >36 mmHg (from ECHO)                                              | 55                                        |
| Rivera-Lebron BN[67] | US           | 2005–2010    | 135                                        | Review of IPF patients evaluated for lung transplantation at a university hospital | ATS/ERS                 | mPAP ≥25 mmHg and pulmonary capillary wedge pressure PWP <15 mmHg      | 29                                        |
| Sherbini N[75]       | Saudi Arabia | 2007–2012    | 134                                        | IPF patients' data from 2 tertiary care hospitals                                  | ATS/ERS                 | NR (from ECHO)                                                         | 12                                        |
| Song JW[70]          | Korea        | 1996–2008    | 131                                        | Patients who underwent both ECHO and BNP measurement at a tertiary referral center | ATS/ERS                 | sPAP ≥40 mmHg (from ECHO)                                              | 25                                        |
| Castra D[44]         | Italy        | 2001–NR      | 126                                        | Review of medical records of IPF patients from a single center                     | ATS/ERS                 | PH: sPAP > 36 mmHg (from ECHO) or mPAP >25 mmHg and PWP <15 (from RHC) | 40                                        |
| Tomassetti           | Italy        | 2000–        | 122                                        | IPF patients                                                                       | ATS/ERS                 | sPAP ≥36 mmHg (from                                                    | 61                                        |

| Reference       | Country | Study Period | Sample Size | Study Population                                                                                | IPF Diagnostic Criteria | PH Case Ascertainment                                                                                                                                                                            | Prevalence (%)                                    |    |
|-----------------|---------|--------------|-------------|-------------------------------------------------------------------------------------------------|-------------------------|--------------------------------------------------------------------------------------------------------------------------------------------------------------------------------------------------|---------------------------------------------------|----|
| S[49]           |         | 2009         |             | identified from a database of a hospital's pneumology unit <sup>b</sup>                         |                         | ECHO)                                                                                                                                                                                            |                                                   |    |
| Hyldgaard C[48] | Denmark | 2003 – 2009  | 121         | IPF patients identified from an Interstitial Lung Disease Registry at a University Hospital,    | ATS/ERS/JRS/AL<br>AT    | tricuspid pressure regurgitation gradient $\geq 40$ mmHg, a tricuspid annular plane systolic excursion $< 1.8$ cm or right ventricular dilatation on ECHO and/or mPAP $\geq 25$ mmHg (from RHC). | 21                                                |    |
| Minai OA[64]    | US      | 1990–2007    | 119         | Consecutive IPF patients evaluated for lung transplantation at the Cleveland Clinic             | ATS/ERS/JRS/AL<br>AT    | PH                                                                                                                                                                                               | mPAP $\geq 25$ mmHg (RHC)                         | 44 |
|                 |         |              |             |                                                                                                 |                         | PVH                                                                                                                                                                                              | mPAP $\geq 25$ mmHg and PAOP $> 15$ mmHg (RHC)    | 13 |
|                 |         |              |             |                                                                                                 |                         | PAH                                                                                                                                                                                              | mPAP $\geq 25$ mmHg and PAOP $\leq 15$ mmHg (RHC) | 29 |
| Nathan SD[59]   | US      | 1997–2005    | 118         | IPF patients seen at a tertiary referral center with both PFT and RHC data available (potential | ATS/ERS                 | mPAP $\geq 25$ mmHg (from RHC)                                                                                                                                                                   | 41                                                |    |

| Reference        | Country | Study Period | Sample Size | Study Population                                                                                                                       | IPF Diagnostic Criteria | PH Case Ascertainment                                                                                      | Prevalence (%) |
|------------------|---------|--------------|-------------|----------------------------------------------------------------------------------------------------------------------------------------|-------------------------|------------------------------------------------------------------------------------------------------------|----------------|
|                  |         |              |             | overlapping samples with Nathan SD[60])                                                                                                |                         |                                                                                                            |                |
| Gagermeier J[62] | US      | NR           | 117         | Patients identified from the database of the Simmons Center for ILD                                                                    | NR                      | PH<br>sPAP $\geq$ 30 mmHg (from ECHO)                                                                      | 40             |
|                  |         |              |             |                                                                                                                                        |                         | Modera<br>te to<br>severe<br>PH<br>Right<br>ventricular<br>systolic<br>pressure $\geq$ 45 mmHg (from ECHO) | 17             |
| Nathan SD[60]    | US      | 1996–2006    | 110         | IPF patients from 2 large tertiary centers in whom both ECHO and RHC were available (potential overlapping samples with Nathan SD[59]) | ATS/ERS                 | mPAP >25 mmHg (from RHC)                                                                                   | 35             |
| Kimura M[74]     | Japan   | 2001–2009    | 101         | IPF patients identified from a database from a single hospital                                                                         | ATS/ERS                 | mPAP >25 mm Hg (from RHC)                                                                                  | 15             |
|                  |         |              |             |                                                                                                                                        |                         | mPAP >35 mm Hg                                                                                             | 4              |

| Reference      | Country | Study Period | Sample Size | Study Population                                                                                                                                                   | IPF Diagnostic Criteria | PH Case Ascertainment                                                                                       | Prevalence (%) |
|----------------|---------|--------------|-------------|--------------------------------------------------------------------------------------------------------------------------------------------------------------------|-------------------------|-------------------------------------------------------------------------------------------------------------|----------------|
| Mejia M[6]     | Mexico  | 1996–2006    | 97          | Clinical records for consecutive IPF patients at the National Institute of Respiratory Diseases                                                                    | ATS/ERS                 | PAH<br>sPAP $\geq$ 45 mmHg (from ECHO)                                                                      | 80             |
|                |         |              |             |                                                                                                                                                                    |                         | Mild/moderate PAH<br>sPAP $\geq$ 50 mmHg (from ECHO)                                                        | 67             |
|                |         |              |             |                                                                                                                                                                    |                         | Severe PAH<br>sPAP $\geq$ 75 mmHg (from ECHO)                                                               | 30             |
| Nadrous HF[5]  | US      | 1994–1996    | 88          | IPF patients evaluated at Mayo Clinic in Rochester, who had complete results available from a comprehensive ECHO evaluation within 3 months of their initial visit | ATS/ERS                 | PH<br>sPAP >35 (from ECHO)                                                                                  | 84             |
|                |         |              |             |                                                                                                                                                                    |                         | Mild/moderate PH<br>sPAP >35– $\leq$ 50 mmHg (from ECHO)                                                    | 53             |
|                |         |              |             |                                                                                                                                                                    |                         | Severe PH<br>sPAP >50 mmHg (from ECHO)                                                                      | 31             |
| Swigris JJ[51] | US      | 2006–2009    | 82          | IPF patients who performed a 6MWT as part of their clinical evaluation and were followed                                                                           | ATS/ERS                 | mPAP $\geq$ 25 mmHg (from RHC) in the face of a pulmonary artery occlusion pressure that was $\leq$ 15 mmHg | 26             |

| Reference       | Country | Study Period | Sample Size | Study Population                                                                                                                                                                             | IPF Diagnostic Criteria | PH Case Ascertainment                      | Prevalence (%) |
|-----------------|---------|--------------|-------------|----------------------------------------------------------------------------------------------------------------------------------------------------------------------------------------------|-------------------------|--------------------------------------------|----------------|
|                 |         |              |             | to lung transplantation or death                                                                                                                                                             |                         |                                            |                |
| Boutou AK[42]   | Greece  | 2002–2007    | 81          | Consecutive IPF patients evaluated over a 6-year period                                                                                                                                      | ATS/ERS                 | sPAP >35 mmHg (from ECHO)                  | 57             |
|                 |         |              |             |                                                                                                                                                                                              |                         | Severe: sPAP >50 mmHg (from ECHO)          | 20             |
|                 |         |              |             |                                                                                                                                                                                              |                         | mild/moderate: sPAP 35–50 mmHg (from ECHO) | 37             |
| Lettieri CJ[57] | US      | 1998–2004    | 79          | Medical records from all IPF patients at Walter Reed Army Medical Center, Washington, D.C., who had undergone RHC as part of their evaluation prior to being listed for lung transplantation | ATS/ERS                 | mPAP >25 mmHg (from RHC)                   | 32             |
| Hamada K[69]    | Japan   | 1991–2004    | 70          | Consecutive IPF patients undergoing initial workup with RHC and PFT                                                                                                                          | ATS/ERS                 | mPAP >25 mmHg (from RHC)                   | 8              |
| Zisman DA[55]   | US      | 1999–2006    | 65          | Cross-sectional study of patients with advanced IPF                                                                                                                                          | ATS/ERS                 | mPAP >25 mmHg (from RHC)                   | 42             |

| Reference                   | Country | Study Period      | Sample Size | Study Population                                                                                                                                          | IPF Diagnostic Criteria                                             | PH Case Ascertainment                                                                   | Prevalence (%) |
|-----------------------------|---------|-------------------|-------------|-----------------------------------------------------------------------------------------------------------------------------------------------------------|---------------------------------------------------------------------|-----------------------------------------------------------------------------------------|----------------|
|                             |         |                   |             | and available RHC<br>and HRCT                                                                                                                             |                                                                     |                                                                                         |                |
| Carbone R[45]               | Italy   | 1985–2006         | 59          | IPF patients referred to a single center                                                                                                                  | ATS/ERS                                                             | sPAP >55 mmHg (from ECHO)                                                               | 66             |
| Modrykami en AM[63]         | US      | 1990–2007         | 58          | Lung transplant patients with pre-transplant IPF diagnosis                                                                                                | Pathology reports showing presence of UIP pattern in explanted lung | PAH post-transplant mPAP >25 mmHg (RHC) and PAOP <15 mmHg                               | 43             |
| Ventetuolo CE[50]           | US      | 2007–2009         | 52          | Patients from the New York Presbyterian/Columbia University Medical Center ILD and Lung Transplantation Programs with both hemodynamics and banked plasma | ATS/ERS                                                             | mPAP ≥25 mmHg (from RHC)                                                                | 31             |
| Nakayama I[65] <sup>a</sup> | US      | NR (3-year study) | 50          | Patients seen at 2 hospitals who had an ICD-9 code for IPF, had both ECHO and PFT, and who had not been referred for lung transplantation                 | ICD-9 code                                                          | By tricuspid regurgitation gradient (from ECHO) (specific diagnostic cut-off for PH NR) | 50             |
| Andersen CU[40]             | Denmark | NR                | 49          | Patients recruited during 16 months at                                                                                                                    | ATS/ERS                                                             | mPAP >25 mmHg (from RHC); TR >40                                                        | 79             |

| Reference              | Country      | Study Period | Sample Size | Study Population                                                                                          | IPF Diagnostic Criteria                                                                               | PH Case Ascertainment                                                                               | Prevalence (%)                                                     |
|------------------------|--------------|--------------|-------------|-----------------------------------------------------------------------------------------------------------|-------------------------------------------------------------------------------------------------------|-----------------------------------------------------------------------------------------------------|--------------------------------------------------------------------|
|                        |              |              |             | a tertiary referral center for evaluation and treatment of<br>ILD                                         |                                                                                                       | mmHg; TAPSE <1.8 cm or right ventricular dilatation (from ECHO)                                     |                                                                    |
| Fernandez Perez ER[28] | US           | 1997–2005    | 47          | Population-based sample of adult patients with IPF in Olmsted County, Minn.                               | ATS/ERS                                                                                               | Right ventricular systolic pressure $\geq$ 40 mmHg and peak TR $\geq$ 2.9 m/s on transthoracic ECHO | 53                                                                 |
| Alhamad EH[71]         | Saudi Arabia | 2008–2010    | 45          | Consecutive IPF patients from a single center                                                             | ATS/ERS                                                                                               | mPAP $\geq$ 25 mmHg (from RHC)                                                                      | 38                                                                 |
| Nathan SD[54]          | US           | 2000–2005    | 44          | IPF patients at single hospital who underwent lung transplantation and in whom serial RHCs were available | ATS/ERS                                                                                               | mPAP $\geq$ 25 mmHg (from RHC)                                                                      | At time of transplant evaluation: 39;<br>at time of transplant: 86 |
| Handa T[72]            | Japan        | 2004–2005    | 39          | Consecutively enrolled patients who were being evaluated for PH by Doppler ECHO                           | Histological confirmation or clinically diagnosed based on typical clinical and radiographic findings | sPAP $\geq$ 40 mmHg; mild PH sPAP 40–50 mmHg (from ECHO)                                            | 36                                                                 |
| Van Der Plas           | Not Reported | NR           | 38          | ILD protocol database                                                                                     | NR                                                                                                    | sPAP $\geq$ 40 mmHg (from ECHO)                                                                     | 29                                                                 |

| Reference               | Country  | Study Period | Sample Size                            | Study Population                                                                 | IPF Diagnostic Criteria                                                                                         | PH Case Ascertainment                                                                                                               | Prevalence (%)                   |
|-------------------------|----------|--------------|----------------------------------------|----------------------------------------------------------------------------------|-----------------------------------------------------------------------------------------------------------------|-------------------------------------------------------------------------------------------------------------------------------------|----------------------------------|
| MN[47] <sup>a</sup>     | (Europe) |              |                                        |                                                                                  |                                                                                                                 |                                                                                                                                     |                                  |
| Saggar R[53]            | US       | 2003–2007    | 38                                     | All lung transplant patients at the UCLA                                         | ATS/ERS                                                                                                         | Assessed by RHC, cut-offs for PAH diagnosis<br>NR                                                                                   | 42 (pre-transplant)              |
| Simon-Blancal V[18]     | France   | 2002–2009    | Survivors : n=27; non-survivors : n=10 | Medical records of all IPF patients that experienced an AE and were hospitalized | ATS/ERS                                                                                                         | sPAP >50 mmHg (from ECHO)                                                                                                           | Survivors: 44; non-survivors: 60 |
| Poor H[66] <sup>a</sup> | US       | NR           | 37                                     | IPF patients from single medical clinic                                          | ATS/ERS                                                                                                         | NR                                                                                                                                  | 31                               |
| Laz <sup>N[73],a</sup>  | Egypt    | NR           | 33                                     | NR                                                                               | On the basis of clinical data, plain chest radiography, HRCT, and presence of restrictive pulmonary dysfunction | sPAP >40 mmHg (from ECHO)                                                                                                           | 36                               |
| Bodlet A[25]            | Belgium  | 1981 - 2011  | 32                                     | Medical files IPF patients at single university hospital                         | ATS/ERS/JRS/AL<br>AT                                                                                            | sPAP >30 mmHg (ECHO)                                                                                                                | 38                               |
| Agarwal R[68]           | India    | NR           | 25                                     | IPF patients (no other detail provided)                                          | ATS/ERS                                                                                                         | sPAP: ≥40 mmHg or pulmonary acceleration time ≤100 milliseconds or 2-dimensional ECHO findings of the right ventricular enlargement | 36                               |



| Reference     | Country | Study Period | Sample Size | Study Population                                                                                                       | IPF Diagnostic Criteria | PH Case Ascertainment                     | Prevalence (%) |
|---------------|---------|--------------|-------------|------------------------------------------------------------------------------------------------------------------------|-------------------------|-------------------------------------------|----------------|
| Zisman DA[58] | US      | 1997–2007    | 18          | Cross-sectional study of IPF patients from 2 institutions                                                              | ATS/ERS                 | mPAP > 25 mmHg (from RHC)                 | 32             |
| Wiggins J[46] | UK      | NR           | 8           | Current or ex-heavy smokers with IPF who were referred to single center for further assessment and advice on treatment | “clinical diagnosis”    | Clinical evidence of PH supported by ECHO | 25             |

<sup>a</sup> Abstract only; <sup>b</sup> These studies likely have some overlap in patient samples

Abbreviations: 6MWT: Six-minute walk test; AE: Acute exacerbation; BNP: Brain natriuretic peptide; ECHO: Echocardiography; ILD: Interstitial lung disease; NR: Not reported; PAH: Pulmonary arterial hypertension; PAOP: Pulmonary artery occlusion pressure; PFT: Pulmonary function testing; PVH: Pulmonary venous hypertension; PWP: Pulmonary capillary wedge pressure; RHC: Right heart catheterization; TAPSE: Tricuspid annular plane systolic excursion; TR: Tricuspid pressure regurgitation; UIP: usual interstitial pneumonia; UK: United Kingdom; UNOS: United Network for Organ Sharing; US: United States

**Supplementary Table S3. Prevalence of Obstructive Sleep Apnea among IPF Patients**

| Reference              | Country | Study Period | Sample Size | Study Population                                                              | IPF Diagnostic Criteria | Obstructive Sleep Apnea Case ascertainment |                                 | Prevalence (%) |
|------------------------|---------|--------------|-------------|-------------------------------------------------------------------------------|-------------------------|--------------------------------------------|---------------------------------|----------------|
| Collard HR[26]         | US      | 2001–2008    | 9,286       | Patients with IPF identified from two US claims databases                     | ICD-9 codes             | ICD-9 codes                                |                                 | 6              |
| Lancaster LH[7]        | US      | 2006–2008    | 50          | Patients with IPF who had been followed up in the Vanderbilt Pulmonary Clinic | ATS/ERS                 | OSA                                        | AHI of $\geq 5$ events per hour | 88             |
|                        |         |              |             |                                                                               |                         | Mild OSA                                   | 5.1–15 events/hour              | 20             |
|                        |         |              |             |                                                                               |                         | Moderate-to-severe OSA                     | >15 events/hour                 | 68             |
| Fernandez Perez ER[28] | US      | 1997–2005    | 47          | Population-based sample of adult patients with IPF in Olmsted County, Minn.   | ATS/ERS                 | NR                                         |                                 | 17             |
| Mermigkis C[77]        | Greece  | 2007–2009    | 34          | Consecutive IPF patients evaluated at 4 pulmonary departments                 | ATS/ERS                 | OSA                                        | AHI of $\geq 5$ events per hour | 59             |
|                        |         |              |             |                                                                               |                         | Mild OSA                                   | 5–15 events/hour                | 44             |
|                        |         |              |             |                                                                               |                         | Moderate-to-severe OSA                     | >15 events/hour                 | 15             |

| Reference       | Country | Study Period | Sample Size | Study Population                                                                                              | IPF Diagnostic Criteria | Obstructive Sleep Apnea Case ascertainment                                                                                                   |                                 | Prevalence (%) |
|-----------------|---------|--------------|-------------|---------------------------------------------------------------------------------------------------------------|-------------------------|----------------------------------------------------------------------------------------------------------------------------------------------|---------------------------------|----------------|
| Kolilekas L[79] | Greece  | NR           | 31          | Consecutive IPF patients referred to an outpatient interstitial lung disease unit who underwent overnight PSG | ATS/ERS                 | OSA                                                                                                                                          | AHI of $\geq 5$ events per hour | 91             |
|                 |         |              |             |                                                                                                               |                         | Mild OSA                                                                                                                                     | 5–15 events/hour                | 39             |
|                 |         |              |             |                                                                                                               |                         | Moderate-to-severe OSA                                                                                                                       | >15 events/hour                 | 52             |
| Lee RNC[78, 80] | Ireland | 2009–2012    | 20          | IPF Patients selected from a Hospital IPF database who underwent overnight PSG                                | ATS/ERS                 | AHI $\geq 5$ /hour                                                                                                                           |                                 | 45             |
|                 |         |              |             |                                                                                                               |                         | AHI $\geq 5$ hour & significant daytime sleepiness                                                                                           |                                 | 10             |
| Mermigkis C[81] | US      | 2001–2005    | 18          | Patients with IPF admitted to the Cleveland Clinic who had an all-night PSG                                   | ATS/ERS                 | Reduction in airflow >90% lasting $\geq 10$ s in which there was evidence of persistent respiratory effort (AHI of $\geq 5$ events per hour) |                                 | 61             |

<sup>a</sup> Five patients had AHI >5, though only one reported daytime sleepiness and thus was diagnosed with OSA.

Abbreviations: AHI: Apnea-hypopnea index; NR: Not reported; PSG: Polysomnogram

**Supplementary Table S4. Frequency of Lung Cancer among IPF Patients**

| Reference      | Country | Study Period      | Sample Size | Study Population                                                                                                                            | IPF Diagnostic Criteria | Lung Cancer Case Ascertainment | Prevalence (%) | Incidence     |
|----------------|---------|-------------------|-------------|---------------------------------------------------------------------------------------------------------------------------------------------|-------------------------|--------------------------------|----------------|---------------|
| Collard HR[26] | US      | 2001–2008         | 9,286       | Patients with IPF identified from 2 claims databases                                                                                        | ICD-9 Codes             | ICD-9 Codes                    | 3              | 11.8/1,000 PY |
| Lee KJ[89]     | Korea   | 2003–2007         | 1,685       | Medical records of IPF patients from all tertiary and teaching university hospitals of more than 500 beds that employ pulmonary specialists | ATS/ERS                 | Pathologic biopsies            | 7              | 1.03/100 PY   |
| Le Jeune I[82] | UK      | NR (“up to 2004”) | 1,064       | IPF patients identified from the THIN database                                                                                              | Read Codes              | Read Codes                     | 3              | 1.12/100 PY   |
| Hubbard R[83]  | UK      | 1988              | 890         | IPF patients identified from the GPRD database                                                                                              | Read Codes              | Read Codes                     | 4              | NR            |
| Park J[90]     | Korea   | 1989–1998         | 281         | Patients diagnosed with                                                                                                                     | Diffuse interstitial    | Lung biopsies                  | 22             | NR            |

| Reference  | Country | Study Period | Sample Size | Study Population                                                                    | IPF Diagnostic Criteria                                                                                                            | Lung Cancer Case Ascertainment                                                                     | Prevalence (%) | Incidence |
|------------|---------|--------------|-------------|-------------------------------------------------------------------------------------|------------------------------------------------------------------------------------------------------------------------------------|----------------------------------------------------------------------------------------------------|----------------|-----------|
|            |         |              |             | IPF at single medical center during the study period                                | lung disease without known aetiology; compatible clinical findings; and pathological confirmation by surgical lung biopsy, or HRCT |                                                                                                    |                |           |
| Kim ES[92] | Korea   | 2005–2009    | 268         | IPF patients from a tertiary care hospital                                          | ATS/ERS                                                                                                                            | NR                                                                                                 | 4              | NR        |
| Lee HJ[91] | Korea   | 1988–1995    | 244         | Consecutive IPF patients evaluated at Seoul National University College of Medicine | CT and clinical findings or histologically                                                                                         | Histologically confirmed based on surgery, sputum cytology, percutaneous needle aspiration biopsy, | 13             | NR        |

| Reference       | Country | Study Period | Sample Size | Study Population                                                                                                      | IPF Diagnostic Criteria                                                                                                                                                      | Lung Cancer Case Ascertainment                        | Prevalence (%) | Incidence |
|-----------------|---------|--------------|-------------|-----------------------------------------------------------------------------------------------------------------------|------------------------------------------------------------------------------------------------------------------------------------------------------------------------------|-------------------------------------------------------|----------------|-----------|
|                 |         |              |             |                                                                                                                       |                                                                                                                                                                              | transbronchial lung biopsy, or pleural fluid cytology |                |           |
| Hyldgaard C[48] | Denmark | 2003 – 2009  | 121         | IPF patients identified from an Interstitial Lung Disease Registry at a University Hospital,                          | ATS/ERS/JRS/ALAT                                                                                                                                                             | NR                                                    | 6              | 3.6%/year |
| Xu YX[84]       | China   | 1999– 2009   | 104         | Medical records of all IPF + lung cancer and IPF-alone patients admitted to the Peking Union Medical College hospital | diffuse interstitial lung disease with unknown etiology; compatible clinical findings, such as inspiratory crackles in both lower lung fields; and pathological confirmation | NR                                                    | 23             | NR        |

| Reference   | Country | Study Period | Sample Size | Study Population                                                        | IPF Diagnostic Criteria                                                                                            | Lung Cancer Case Ascertainment                                                                                          | Prevalence (%)  | Incidence                                                                 |
|-------------|---------|--------------|-------------|-------------------------------------------------------------------------|--------------------------------------------------------------------------------------------------------------------|-------------------------------------------------------------------------------------------------------------------------|-----------------|---------------------------------------------------------------------------|
|             |         |              |             |                                                                         | or HRCT showing typical patterns of IPF                                                                            |                                                                                                                         |                 |                                                                           |
| Ozawa Y[85] | Japan   | 1986–2005    | 103         | IPF patients without lung cancer at the time of their initial diagnosis | ATS/ERS                                                                                                            | NR                                                                                                                      | 20 <sup>a</sup> | Cumulative incidence<br>1 year: 3.3%<br>5 years: 15.4%<br>10 years: 54.7% |
| Nagai A[86] | Japan   | 1980–1992    | 99          | Patients examined at Tokyo's Women's Medical College hospital           | findings of chest radiography, lung biopsy, bronchoalveolar lavage, serum immunological examinations and pulmonary | Histologic examination was performed on specimens obtained by transbronchial lung biopsy, surgical treatment or autopsy | 31              | NR                                                                        |

| Reference        | Country | Study Period | Sample Size | Study Population                                     | IPF Diagnostic Criteria                                                         | Lung Cancer Case Ascertainment                                | Prevalence (%) | Incidence |
|------------------|---------|--------------|-------------|------------------------------------------------------|---------------------------------------------------------------------------------|---------------------------------------------------------------|----------------|-----------|
|                  |         |              |             |                                                      | function tests as well as detailed historical evaluation.                       |                                                               |                |           |
| Araki T[34]      | Japan   | 1978–1997    | 86          | Consecutive autopsy series of IPF patients >65 years | ATS/ERS                                                                         | NR                                                            | 22             | NR        |
| Matsushita H[88] | Japan   | 1972–1992    | 83          | Consecutive autopsy cases in Toranomon Hospital      | Clinical findings; histological changes and pathological diagnosis from autopsy | Chest X-ray films or CT scans, and macroscopical examinations | 48             | NR        |



| Reference              | Country | Study Period | Sample Size | Study Population                                                            | IPF Diagnostic Criteria                                                                                                            | Lung Cancer Case Ascertainment | Prevalence (%) | Incidence |
|------------------------|---------|--------------|-------------|-----------------------------------------------------------------------------|------------------------------------------------------------------------------------------------------------------------------------|--------------------------------|----------------|-----------|
| Qunn L[87]             | Japan   | 1973–1996    | 72          | Consecutive autopsy cases                                                   | based on the clinical symptoms, reduced pulmonary function, reticulonodular shadow on chest radiography, and histopathology of UIP | Lung biopsies                  | 43             | NR        |
| Fernandez Perez ER[28] | US      | 1997–2005    | 47          | Population-based sample of adult patients with IPF in Olmsted County, Minn. | ATS/ERS                                                                                                                            | ICD-9 Codes                    | 8              | NR        |

<sup>a</sup>Twenty percent of patients developed lung cancer during the study period, post-IPF diagnosis.

Abbreviations: GPRD: General Practice Research Database; HRCT: high-resolution computed tomography; NR: Not reported;

THIN: The Health Improvement Network; UIP: usual interstitial pneumonia

**Supplementary Table S5. Prevalence of PE among IPF Patients**

| Reference        | Country | Study Period | Sample Size | Sample Source                                                              | IPF Diagnostic Criteria                                                                                                                                                                                                                                                                                                                            | PE Case Ascertainment      | Prevalence (%) |
|------------------|---------|--------------|-------------|----------------------------------------------------------------------------|----------------------------------------------------------------------------------------------------------------------------------------------------------------------------------------------------------------------------------------------------------------------------------------------------------------------------------------------------|----------------------------|----------------|
| Collard HR[26]   | US      | 2001–2008    | 9,286       | IPF patients identified through medical claims                             | ICD-9 codes                                                                                                                                                                                                                                                                                                                                        | ICD-9 codes                | 3              |
| Tomassetti S[49] | Italy   | 2000–2009    | 122         | Patients with IPF identified in a database of a hospital's pneumology unit | ATS/ERS                                                                                                                                                                                                                                                                                                                                            | Recorded in medical record | 3              |
| Saydain G[100]   | US      | 1995–2000    | 38          | IPF patients admitted to the ICU                                           | (1) surgical biopsy showing UIP; (2) abnormal pulmonary function studies that included evidence of restriction, and/or increased alveolar-arterial oxygen tension gradient at rest or during exercise, or decreased diffusing capacity for carbon monoxide; and (3) chest radiograph or HRCT suggestive of UIP. In the absence of surgical biopsy, | NR                         | 6              |

| Reference | Country | Study Period | Sample Size | Sample Source | IPF Diagnostic Criteria                                                                                  | PE Case Ascertainment | Prevalence (%) |
|-----------|---------|--------------|-------------|---------------|----------------------------------------------------------------------------------------------------------|-----------------------|----------------|
|           |         |              |             |               | patients had to fulfill all of the major criteria and $\geq 3$ of the four minor criteria of the ATS/ERS |                       |                |

Abbreviation: HRCT: high-resolution computed tomography; NR: Not reported; UIP: usual interstitial pneumonitis

**Supplementary Table S6. Prevalence of Gastroesophageal Reflux among IPF Patients**

| Reference      | Country      | Study Period | Sample Size | Study Population                                                                           | IPF Diagnostic Criteria | GERD Case Ascertainment                                                      | Prevalence (%) |
|----------------|--------------|--------------|-------------|--------------------------------------------------------------------------------------------|-------------------------|------------------------------------------------------------------------------|----------------|
| Collard HR[26] | US           | 2001–2008    | 9,286       | IPF patients identified from claims databases                                              | ICD-9 codes             | ICD-9 codes                                                                  | 7              |
| Gribbin J[102] | UK           | 1991–2003    | 920         | IPF patients identified from UK general practices contributing data to THIN                | Read codes              | Read codes                                                                   | 30             |
| Ryerson CJ[27] | US           | 2000–2010    | 242         | IPF patients identified from a longitudinal ILD database                                   | ATS/ERS                 | Patient questionnaire and chart review                                       | 36             |
| Lee JS[10]     | US           | 2001–2008    | 204         | IPF patients identified from longitudinal cohorts of patients with ILD from 2 institutions | ATS/ERS/JRS/ALAT        | History of Nissen fundoplication (with indication for the treatment of GERD) | 5              |
|                |              |              |             |                                                                                            |                         | Reported symptoms of heartburn or regurgitation                              | 33             |
|                |              |              |             |                                                                                            |                         | Patient or physician reporting of GERD diagnosis                             | 45             |
|                |              |              |             |                                                                                            |                         | Use of proton pump inhibitor or H2 blocker                                   | 47             |
| Sherbini N[75] | Saudi Arabia | 2007–2012    | 134         | IPF patients' data from 2 tertiary care                                                    | ATS/ERS                 | NR                                                                           | 23             |

| Reference            | Country | Study Period | Sample Size | Study Population                                                                             | IPF Diagnostic Criteria | GERD Case Ascertainment                         | Prevalence (%)                                                                                                                                                                                                                                                                            |
|----------------------|---------|--------------|-------------|----------------------------------------------------------------------------------------------|-------------------------|-------------------------------------------------|-------------------------------------------------------------------------------------------------------------------------------------------------------------------------------------------------------------------------------------------------------------------------------------------|
|                      |         |              |             | hospitals                                                                                    |                         |                                                 |                                                                                                                                                                                                                                                                                           |
| Lamas DJ[108]        | US      | 2007–2010    | 129         | IPF patients recruited from a single center                                                  | ATS/ERS                 | Patient questionnaire and medical record review | <p>&lt;1-year delay to first evaluation after onset of dyspnea: 21</p> <p>1-to-2-year delay to first evaluation after onset of dyspnea: 27</p> <p>2-to-4-year delay to first evaluation after onset of dyspnea: 28</p> <p>4-year delay to first evaluation after onset of dyspnea: 65</p> |
| Hyldgaard C[48]      | Denmark | 2003 – 2009  | 121         | IPF patients identified from an Interstitial Lung Disease Registry at a University Hospital, | ATS/ERS/JRS/<br>ALAT    | NR                                              | 8                                                                                                                                                                                                                                                                                         |
| Garcia-Sancho C[106] | Mexico  | 2007–2009    | 100         | Consecutive, newly diagnosed IPF patients from a single institution                          | ATS/ERS                 | Self-report                                     | 23                                                                                                                                                                                                                                                                                        |

| Reference     | Country | Study Period | Sample Size | Study Population                                                        | IPF Diagnostic Criteria                                                      | GERD Case Ascertainment                                                         | Prevalence (%) |
|---------------|---------|--------------|-------------|-------------------------------------------------------------------------|------------------------------------------------------------------------------|---------------------------------------------------------------------------------|----------------|
| Raghu G[4]    | US      | NR           | 65          | Consecutive, newly referred IPF patients recruited from a single center | ATS/ERS                                                                      | Self-reported heartburn and regurgitation                                       | 47             |
|               |         |              |             |                                                                         |                                                                              | On anti-reflux therapy (PPI or H <sub>2</sub> blocker) at time of of evaluation | 66             |
|               |         |              |             |                                                                         |                                                                              | Abnormal acid GER among patients not receiving PPI therapy (n=47)               | 87             |
|               |         |              |             |                                                                         |                                                                              | Abnormal distal acid exposure among patients not receiving PPI therapy (n=47)   | 76             |
|               |         |              |             |                                                                         |                                                                              | Abnormal proximal acid exposure among patients not receiving PPI therapy (n=47) | 63             |
| Vij R[109]    | US      | 2005–2008    | 58          | IPF patients recruited from a single clinic                             | ATS/ERS                                                                      | NR                                                                              | 17             |
| Corte TJ[103] | UK      | 1978–2005    | 56          | IPF patients identified from a hospital database (n=232)                | „met the histological criteria at surgical biopsy and the clinical criteria“ | NR                                                                              | 38             |

| Reference           | Country | Study Period | Sample Size | Study Population                                                                                                 | IPF Diagnostic Criteria                                                                                                                               | GERD Case Ascertainment                    | Prevalence (%) |
|---------------------|---------|--------------|-------------|------------------------------------------------------------------------------------------------------------------|-------------------------------------------------------------------------------------------------------------------------------------------------------|--------------------------------------------|----------------|
| Savarino E[115]     | Italy   | 2007–2011    | 40          | Consecutive IPF patients                                                                                         | Based on the absence of an identifiable aetiology for ILD and a histopathologic al/radiological pattern of UIP on surgical lung biopsy and HRCT scans | GERD symptoms: heartburn and regurgitation | 48             |
|                     |         |              |             |                                                                                                                  |                                                                                                                                                       | GERD medications                           | 40             |
|                     |         |              |             |                                                                                                                  |                                                                                                                                                       | abnormal distal acid exposure              | 83             |
| Fahim A[104]        | UK      | NR           | 40          | IPF patients attending a single hospital clinic                                                                  | ATS/ERS                                                                                                                                               | Hull Airway Reflux Questionnaire           | 68             |
| Kolilekas L[79]     | Greece  | NR           | 31          | Consecutive IPF patients referred to an Outpatient Interstitial Lung Disease Unit who underwent overnight PSG    | ATS/ERS                                                                                                                                               | NR                                         | 81             |
| Sweet MP[111]       | US      | 1999–2006    | 30          | IPF patients on lung transplant list referred to a single center                                                 | surgical lung biopsy; pathologic review of explanted lung; or ATS/ERS                                                                                 | DeMeester score                            | 67             |
| Lozo Vukovac E[114] | Croatia | 2006 - 2010  | 30          | Newly diagnosed IPF patients from a single hospital who had esophagogastroscopy (EGS) 1 week after IPF diagnosis | NR                                                                                                                                                    | Previous diagnosis                         | 57             |
|                     |         |              |             |                                                                                                                  |                                                                                                                                                       | Reflux symptoms                            | 80             |

| Reference         | Country | Study Period | Sample Size | Study Population                                                                                                                     | IPF Diagnostic Criteria    | GERD Case Ascertainment                                                                                                                                                                                                                | Prevalence (%) |
|-------------------|---------|--------------|-------------|--------------------------------------------------------------------------------------------------------------------------------------|----------------------------|----------------------------------------------------------------------------------------------------------------------------------------------------------------------------------------------------------------------------------------|----------------|
| Bandeira CD [113] | Brazil  | 2004–2008    | 28          | Consecutive IPF patients who underwent esophageal manometry, 24-h esophageal pH-metry and pulmonary function tests at 2 institutions | ATS/ERS                    | Abnormal 24-hour esophageal pH-metry                                                                                                                                                                                                   | 36             |
| D'Ovidio F[105]   | Canada  | 2002–NR      | 26          | Consecutive end-stage IPF patients assessed for lung transplantation                                                                 | NR                         | Esophageal manometry, two-channel esophageal 24-hour pH testing, and gastric emptying studies were performed to determine the presence or absence of typical gastroesophageal reflux symptoms: heartburn, regurgitation, and dysphagia | 65             |
| Lee RNC[80]       | Ireland | 2009–2012    | 20          | IPF Patients selected from a Hospital IPF database who underwent overnight PSG                                                       | ATS/ERS <sup>a</sup>       | NR                                                                                                                                                                                                                                     | 0              |
| Salvioli          | Italy   | NR           | 18          | Consecutive IPF patients                                                                                                             | Medical history, pulmonary | GERD – abnormal esophageal acid                                                                                                                                                                                                        | 67             |



| Reference     | Country | Study Period | Sample Size | Study Population                                                         | IPF Diagnostic Criteria                                                                                                                                                                                                                                                                                                                                            | GERD Case Ascertainment                                                                                     | Prevalence (%) |
|---------------|---------|--------------|-------------|--------------------------------------------------------------------------|--------------------------------------------------------------------------------------------------------------------------------------------------------------------------------------------------------------------------------------------------------------------------------------------------------------------------------------------------------------------|-------------------------------------------------------------------------------------------------------------|----------------|
| B[101]        |         |              |             |                                                                          | function tests, HRCT (specific criteria NR)                                                                                                                                                                                                                                                                                                                        | exposure. Percent of time with pH lower than 4 >4.7% during the 24-h study period (T %pH<4), interdigestive |                |
|               |         |              |             |                                                                          |                                                                                                                                                                                                                                                                                                                                                                    | Typical GERD symptoms: Heartburn, regurgitation                                                             | 72             |
| Patti MG[110] | US      | 2003–2004    | 18          | IPF patients on lung transplant list referred to a single center         | NR                                                                                                                                                                                                                                                                                                                                                                 | DeMesteeer score >14.7                                                                                      | 67             |
| Tobin RW[112] | US      | NR           | 17          | Consecutive, newly diagnosed IPF patients recruited from a single center | Medical history with negative exposure history; no serologic evidence of autoimmune disease; chest radiograph with diffuse parenchymal, basilar-predominant infiltrates; pulmonary function tests with restrictive lung defect and decreased diffusing capacity of carbon monoxide corrected to hemoglobin (Dl COc); and histologic features of usual interstitial | pH probe study – Abnormal distal acid exposure only                                                         | 24             |
|               |         |              |             |                                                                          |                                                                                                                                                                                                                                                                                                                                                                    | pH probe study – Abnormal distal and proximal acid exposure                                                 | 65             |
|               |         |              |             |                                                                          |                                                                                                                                                                                                                                                                                                                                                                    | pH probe study – Abnormal acid exposure in the distal and/or proximal esophagus                             | 94             |
|               |         |              |             |                                                                          |                                                                                                                                                                                                                                                                                                                                                                    | pH probe study – Abnormal esophageal acid                                                                   | 67             |

| Reference      | Country | Study Period | Sample Size | Study Population                                                                                              | IPF Diagnostic Criteria           | GERD Case Ascertainment                        | Prevalence (%) |
|----------------|---------|--------------|-------------|---------------------------------------------------------------------------------------------------------------|-----------------------------------|------------------------------------------------|----------------|
|                |         |              |             |                                                                                                               | pneumonia on surgical lung biopsy | exposure                                       |                |
| Soares RV[107] | US      | 2008–2009    | 16          | IPF/NSIP patients prospectively collected from the referrals for esophageal function tests at a single center | ATS/ERS                           | pH probe study – Abnormal proximal reflux only | 23             |
|                |         |              |             |                                                                                                               |                                   | pH probe study – Abnormal distal reflux only   | 56             |

<sup>a</sup> “confirmed diagnosis of IPF by ATS criteria” Abbreviations: GERD: Gastroesophageal reflux disease; HRCT: high-resolution computed tomography; ILD: interstitial lung disease; NR: Not reported; NSIP: Non-specific interstitial pneumonia; THIN: The Health Improvement Network; UIP: usual interstitial pneumonia

**Supplementary Table S7. Prevalence of IPF Patients with Arrhythmia or Atrial Fibrillation**

| Reference              | Country      | Study Period | Sample Size | Study Population                                                                             | IPF Diagnostic Criteria                                                                 | Arrhythmia, AF Case Ascertainment | Prevalence (%) |
|------------------------|--------------|--------------|-------------|----------------------------------------------------------------------------------------------|-----------------------------------------------------------------------------------------|-----------------------------------|----------------|
| Collard HR[26]         | US           | 2001–2008    | 9,286       | IPF patients identified through medical claims databases                                     | ICD-9 codes                                                                             | ICD-9 codes                       | AF: 12         |
| Hubbard RB[117]        | UK           | NR           | 920         | THIN primary care dataset; IPF cases pre-IPF diagnosis                                       | Read codes                                                                              | Read codes                        | AF: 6          |
| Sherbini N[75]         | Saudi Arabia | 2007–2012    | 134         | IPF patients' data from 2 tertiary care hospitals                                            | ATS/ERS                                                                                 | NR                                | 16             |
| Hyldgaard C[48]        | Denmark      | 2003 – 2009  | 121         | IPF patients identified from an Interstitial Lung Disease Registry at a University Hospital, | ATS/ERS/JRS/ALAT                                                                        | NR                                | 9              |
| Fernandez Perez ER[28] | US           | 1997–2005    | 47          | IPF patients identified via the REP, Olmsted County, Minn.                                   | ATS/ER                                                                                  | NR                                | AF: 19         |
| Daniels CE[118]        | US           | 1996–2004    | 42          | Consecutive patients with IPF who underwent a postmortem evaluation                          | Post mortem evidence of UIP with no connective tissue disease or exposure to fibrogenic | NR                                | Arrhythmia: 7  |

| Reference   | Country | Study Period | Sample Size | Study Population                 | IPF Diagnostic Criteria                              | Arrhythmia, AF Case Ascertainment | Prevalence (%) |
|-------------|---------|--------------|-------------|----------------------------------|------------------------------------------------------|-----------------------------------|----------------|
|             |         |              |             |                                  | drugs or environmental agents having been identified |                                   |                |
| Saito Y[96] | Japan   | 1994–2007    | 28          | IPF patients with stage IA NSCLC | ATS/ERS                                              | NR                                | Arrhythmia: 7  |

Abbreviations: NR: Not reported; NSCLC: Non-small cell lung cancer; REP: Rochester Epidemiology Project; THIN: The Health Improvement Network; UIP: usual interstitial pneumonia

**Supplementary Table S8. Prevalence of IPF Patients with Cardiac Failure or CHF**

| Reference                     | Country | Study Period | Sample Size | Study Population                                                      | IPF Diagnostic Criteria | Cardiac Failure Case Ascertainment | Prevalence (%)                     |    |
|-------------------------------|---------|--------------|-------------|-----------------------------------------------------------------------|-------------------------|------------------------------------|------------------------------------|----|
| Collard HR[26]                | US      | 2001–2008    | 9,286       | IPF patients identified through ICD-9 codes in medical claims         | ICD-9 codes             | ICD-9 codes                        | 20                                 |    |
| Tomassetti S[43] <sup>a</sup> | Italy   | 2002–2009    | 147         | Cases from an IPF clinic at GB Morgagni Hospital                      | ATS/ERS                 | NR                                 | IPF patients not on anticoagulants | 9  |
|                               |         |              | 35          |                                                                       |                         |                                    | IPF patients on anticoagulants     | 26 |
| Tomassetti S[49]              | Italy   | 2000–2009    | 122         | IPF patients identified in a database of a hospital's pneumology unit | ATS/ERS                 | Recorded in medical record         | 14                                 |    |
| Nadrous HF[5]                 | US      | 1994–1996    | 88          | IPF patients evaluated at a tertiary care, referral medical center    | ATS/ERS                 | NR                                 | 11                                 |    |
| Rusanov                       | Israel  | 2009         | 61          | IPF patients                                                          | ATS/ERS                 | NR                                 | 18                                 |    |

| Reference              | Country | Study Period | Sample Size | Study Population                                            | IPF Diagnostic Criteria                                                                                                                                                               | Cardiac Failure Case Ascertainment                                                                                                                                                                                                | Prevalence (%) |
|------------------------|---------|--------------|-------------|-------------------------------------------------------------|---------------------------------------------------------------------------------------------------------------------------------------------------------------------------------------|-----------------------------------------------------------------------------------------------------------------------------------------------------------------------------------------------------------------------------------|----------------|
| V[119]                 |         |              |             | referred for lung transplantation                           |                                                                                                                                                                                       |                                                                                                                                                                                                                                   |                |
| Fernandez Perez ER[28] | US      | 1997–2005    | 47          | IPF patients identified via the REP, Olmsted County, Minn.  | ATS/ERS                                                                                                                                                                               | NR                                                                                                                                                                                                                                | 11             |
| Saydain G[100]         | US      | 1995–2000    | 38          | IPF patients admitted to the Mayo Clinic ICU, Rochester, MN | (1) surgical biopsy showing UIP; (2) abnormal pulmonary function studies that included evidence of restriction, and/or increased alveolar-arterial oxygen tension gradient at rest or | $\geq 1$ of the following:<br>Heart rate $\leq 54$ /min.;<br>Mean arterial blood pressure $\leq 49$ mmHg;<br>ventricular tachycardia and/or ventricular Fibrillation;<br>Serum pH $\leq 7.24$ with a $P_aCO_2$ of $\leq 49$ mmHg. | 5              |

| Reference | Country | Study<br>Period | Sample<br>Size | Study<br>Population | IPF<br>Diagnostic<br>Criteria                                                                                                                                                                                                                                                           | Cardiac<br>Failure Case<br>Ascertainment | Prevalence (%) |
|-----------|---------|-----------------|----------------|---------------------|-----------------------------------------------------------------------------------------------------------------------------------------------------------------------------------------------------------------------------------------------------------------------------------------|------------------------------------------|----------------|
|           |         |                 |                |                     | <p>during exercise, or decreased diffusing capacity for carbon monoxide; and (3) chest radiograph or HRCT suggestive of UIP. In the absence of surgical biopsy, patients had to fulfill all of the major criteria and <math>\geq 3</math> of the four minor criteria of the ATS/ERS</p> |                                          |                |

| Reference       | Country   | Study Period | Sample Size | Study Population                 | IPF Diagnostic Criteria | Cardiac Failure Case Ascertainment                                                             | Prevalence (%) |
|-----------------|-----------|--------------|-------------|----------------------------------|-------------------------|------------------------------------------------------------------------------------------------|----------------|
| Saito Y[96]     | Japan     | 1994–2007    | 28          | IPF patients with stage IA NSCLC | ATS/ERS                 | abnormal ECG result, BNP levels exceeding normal reference ranges, or by a clinical evaluation | 4              |
| Rangappa P[120] | Australia | 1996–2006    | 24          | IPF patients admitted to the ICU | ATS/ERS                 | ECHO                                                                                           | 13             |

<sup>a</sup> abstract; Abbreviations: BNP: Brain natriuretic peptide; ECG: echocardiogram; ECHO: Echocardiography; NR: Not reported; NSCLC: Non-small cell lung cancer; REP: Rochester Epidemiology Project



**Supplementary Table S9. Prevalence of IPF Patients with IHD**

| Reference                     | Country | Study Period | Sample Size | Study Population                                                                        | IPF Diagnostic Criteria | IHD Case Ascertainment | Prevalence (%)                                                       |
|-------------------------------|---------|--------------|-------------|-----------------------------------------------------------------------------------------|-------------------------|------------------------|----------------------------------------------------------------------|
| Collard HR[26]                | US      | 2001–2008    | 9,286       | IPF patients identified through ICD-9 codes in medical claims                           | ICD-9 codes             | (CAD)<br>ICD-9 codes   | 25                                                                   |
| Collard HR[26]                | US      | 2001–2008    | 9,286       | IPF patients identified through medical claims                                          | ICD-9 codes             | (MI) ICD-9 codes       | 3                                                                    |
| Kim WY[131]                   | Korea   | 2005 – 2009  | 460         | Database of IPF patients from a Medical Center                                          | ATS/ERS/JRS/ALAT        | CAD <sup>f</sup>       | 7                                                                    |
| Lederer DJ[52]                | US      | 2004–2005    | 454         | IPF patients listed for lung transplantation with UNOS                                  | NR                      | CAD (NR)               | ~4 (average among quintiles of results for patients completing 6MWD) |
| Park J[129] <sup>a</sup>      | Korea   | NR           | 324         | IPF patients admitted to a tertiary referral center, diagnosed by coronary angiography  | Lung biopsy             | IHD (NR)               | 14                                                                   |
| Navaratnam V[132]             | UK      | 2010 – 2012  | 211         | Incident cases of IPF from five teaching hospitals and eight district general hospitals | ATS/ERS                 | Previous IHD (NR)      | 31                                                                   |
| Tomassetti S[43] <sup>a</sup> | Italy   | 2002–2009    | 182         | Cases from an IPF clinic at GB Morgagni Hospital                                        | ATS/ERS                 | IHD (NR)               | Not on anticoagulants: 6<br>On                                       |

| Reference          | Country | Study Period | Sample Size | Study Population                                                                             | IPF Diagnostic Criteria | IHD Case Ascertainment            | Prevalence (%)                               |
|--------------------|---------|--------------|-------------|----------------------------------------------------------------------------------------------|-------------------------|-----------------------------------|----------------------------------------------|
|                    |         |              |             |                                                                                              |                         |                                   | anticoagulants:<br>11                        |
| Papakosta D[41]    | Greece  | 2005–2006    | 139         | IPF patients referred to 8 departments of pneumonology                                       | ATS/ERS                 | CAD (NR)                          | 17                                           |
| Lamas DJ[108]      | US      | 2007–2010    | 129         | IPF patients evaluated at a tertiary care center                                             | ATS/ERS                 | CAD (NR)                          | 15–26 (dependent on delay in access to care) |
| Tomassetti S[49]   | Italy   | 2000–2009    | 122         | IPF patients identified in a database of a hospital's pneumology unit                        | ATS/ERS                 | CAD<br>Recorded in medical record | 20                                           |
| Tomassetti S[49]   | Italy   | 2000–2009    | 122         | Patients with IPF identified in a database of a hospital's pneumology unit                   | ATS/ERS                 | MI<br>Recorded in medical record  | 12                                           |
| Hyldgaard C[48]    | Denmark | 2003–2009    | 121         | IPF patients identified from an Interstitial Lung Disease Registry at a University Hospital, | ATS/ERS/<br>JRS/ALAT    | IHD (NR)                          | 18                                           |
| Miyake Y[126]      | Japan   | 2001         | 104         | IPF patients identified across ~20 hospitals                                                 | ATS/ERS                 | CAD <sup>e</sup>                  | 10                                           |
| Schomberg LEE[127] | UK      | 2003–2010    | 96          | Consecutive cases of IPF from a health care provider, diagnosed by                           | Radiology reports       | STEMI (NR)                        | 21                                           |

| Reference       | Country      | Study Period | Sample Size | Study Population                                                      | IPF Diagnostic Criteria | IHD Case Ascertainment                           | Prevalence (%) |
|-----------------|--------------|--------------|-------------|-----------------------------------------------------------------------|-------------------------|--------------------------------------------------|----------------|
| <sup>a</sup>    |              |              |             | radiology reports                                                     |                         |                                                  |                |
| Nadrous HF[5]   | US           | 1994–1996    | 88          | IPF patients evaluated at a tertiary care, referral medical center    | ATS/ERS                 | CAD (NR)                                         | 35             |
| Swigris JJ[123] | US           | 2003–2008    | 76          | IPF patients evaluated at an ILD center                               | ATS/ERS                 | CAD (NR)                                         | 20             |
| Nathan SD[121]  | US           | 2003–2008    | 73          | IPF patients who completed LHC as part of lung transplant evaluations | ATS/ERS                 | Non-significant and significant CAD <sup>b</sup> | 66             |
|                 |              |              |             |                                                                       |                         | Non-significant CAD <sup>b</sup>                 | 37             |
|                 |              |              |             |                                                                       |                         | Significant CAD <sup>b</sup>                     | 29             |
| Rusanov V[119]  | Israel       | 2009         | 61          | IPF patients referred for lung transplantation                        | ATS/ERS                 | IHD (NR)                                         | 13             |
| Alhamad EH[130] | Saudi Arabia | 1996–2005    | 61          | IPF patients admitted to a hospital                                   | ATS/ERS                 | IHD (NR)                                         | 8              |
| Nathan SD[122]  | US           | 2003–2008    | 57          | IPF patients who completed LHC as part of lung transplant evaluations | ATS/ERS                 | Non-significant CAD <sup>b</sup>                 | 40             |
|                 |              |              |             |                                                                       |                         | Significant CAD <sup>b</sup>                     | 28             |
| Weir            | US           | 2003–        | 52          | IPF patients who had                                                  | NR                      | Significant                                      | 25             |

| Reference              | Country | Study Period | Sample Size | Study Population                                                    | IPF Diagnostic Criteria                                                                                      | IHD Case Ascertainment       | Prevalence (%) |
|------------------------|---------|--------------|-------------|---------------------------------------------------------------------|--------------------------------------------------------------------------------------------------------------|------------------------------|----------------|
| N[124] <sup>a</sup>    |         | 2008         |             | undergone HRCT and LHC                                              |                                                                                                              | t CAD <sup>c</sup>           |                |
| Ponnuswamy A[128]      | UK      | 1999–2004    | 50          | IPF patients diagnosed at a respiratory outpatient clinic           | HRCT                                                                                                         | IHD (NR)                     | 40             |
| Izbicki G[125]         | Israel  | 1997–2003    | 49          | IPF patients who were candidates for lung transplantation           | ATS/ERS                                                                                                      | Significant CAD <sup>d</sup> | 29             |
| Fernandez Perez ER[28] | US      | 1997–2005    | 47          | IPF patients identified via the REP, Olmsted County, Minn.          | ATS/ERS                                                                                                      | CAD (NR)                     | 45             |
| Daniels CE[118]        | US      | 1996–2004    | 42          | Consecutive patients with IPF who underwent a postmortem evaluation | Post mortem evidence of UIP with no connective tissue disease or exposure to fibrogenic drugs or environment | MI (NR)                      | 7              |

| Reference                          | Country | Study Period | Sample Size | Study Population                                                                     | IPF Diagnostic Criteria            | IHD Case Ascertainment       | Prevalence (%) |
|------------------------------------|---------|--------------|-------------|--------------------------------------------------------------------------------------|------------------------------------|------------------------------|----------------|
|                                    |         |              |             |                                                                                      | ntal agents having been identified |                              |                |
| Schomberg<br>LEE[127] <sup>a</sup> | UK      | 2003–2010    | 38          | Consecutive cases of IPF from a health care provider, diagnosed by radiology reports | Radiology reports                  | IHD (NR)                     | 58             |
| Lee<br>RNC[80]                     | Ireland | 2009–2012    | 20          | IPF Patients selected from a Hospital IPF database who underwent overnight PSG       | ATS/ERS <sup>g</sup>               | Inactive CAD <sup>c</sup> NR | 35             |

<sup>a</sup>Abstract;

<sup>b</sup> Nonsignificant CAD: <50% occlusion of a major vessel or disease of smaller vessels as diagnosed with LHC and CT scans; significant CAD: a need for an intervention or major vessel with >50% lesion as diagnosed with LHC and CT scans;

<sup>c</sup> Significant CAD: quantification of coronary calcification observed by LHC and HRCT results;

<sup>d</sup> Significant CAD: ≥50% stenosis of one or more coronary arteries, as reported by coronary angiography;

<sup>e</sup> CAD: having received medication for CAD

<sup>f</sup> symptom and the finding of coronary angiography, coronary computed tomography angiography, thallium scan, or exercise treadmill test.

<sup>g</sup> “confirmed diagnosis of IPF by ATS criteria”

Abbreviations: 6MWD: Six-minute walk distance; HRCT: high-resolution computed tomography; ILD: Interstitial lung disease; NR: Not reported; REP: Rochester Epidemiology Project; STEMI: ST-elevation myocardial infarction; UNOS: United Network for Organ Sharing

**Supplementary Table S10. Prevalence of IPF Patients with Cerebrovascular Accident, Cerebrovascular Disease, and Stroke**

| Reference                       | Country | Study Period | Sample Size | Study Population                                                                             | IPF Diagnostic Criteria                                                                          | Cerebrovascular Accident, Cerebrovascular Disease, Stroke Case Ascertainment | Prevalence (%) |
|---------------------------------|---------|--------------|-------------|----------------------------------------------------------------------------------------------|--------------------------------------------------------------------------------------------------|------------------------------------------------------------------------------|----------------|
| <i>Cerebrovascular Accident</i> |         |              |             |                                                                                              |                                                                                                  |                                                                              |                |
| Hubbard RB[117]                 | UK      | NR           | 920         | THIN primary care dataset; IPF cases pre-IPF diagnosis                                       | Read codes                                                                                       | Read codes                                                                   | 6              |
| Hyldgaard C[48]                 | Denmark | 2003 – 2009  | 121         | IPF patients identified from an interstitial lung disease registry at a university hospital, | ATS/ERS/JRS/ALAT                                                                                 | (cerebrovascular infarction) NR                                              | 9              |
| <i>Cerebrovascular Disease</i>  |         |              |             |                                                                                              |                                                                                                  |                                                                              |                |
| Collard HR[26]                  | US      | 2001–2008    | 9,286       | IPF patients identified through medical claims                                               | ICD-9 codes                                                                                      | ICD-9 codes                                                                  | 9              |
| <i>Stroke</i>                   |         |              |             |                                                                                              |                                                                                                  |                                                                              |                |
| Daniels CE[118]                 | US      | 1996–2004    | 42          | Consecutive patients with IPF who underwent a postmortem evaluation                          | Post mortem evidence of UIP with no connective tissue disease or exposure to fibrogenic drugs or | NR                                                                           | 3              |

| Reference | Country | Study<br>Period | Sample<br>Size | Study<br>Population | IPF<br>Diagnostic<br>Criteria                        | Cerebrovascular<br>Accident,<br>Cerebrovascular<br>Disease, Stroke Case<br>Ascertainment | Prevalence<br>(%) |
|-----------|---------|-----------------|----------------|---------------------|------------------------------------------------------|------------------------------------------------------------------------------------------|-------------------|
|           |         |                 |                |                     | environmental<br>agents having<br>been<br>identified |                                                                                          |                   |

Abbreviations: NR: Not reported; THIN: The Health Improvement Network;

**Supplementary Table S11. Prevalence of IPF Patients with Arterial Hypertension**

| Reference       | Country | Study Years | Sample Size | Study Population                                       | IPF Diagnostic Criteria | Arterial Hypertension Case Ascertainment                                                                   | Prevalence (%) |
|-----------------|---------|-------------|-------------|--------------------------------------------------------|-------------------------|------------------------------------------------------------------------------------------------------------|----------------|
| Lederer DJ[133] | US      | 1995–2003   | 2,635       | IPF patients listed for lung transplantation with UNOS | NR                      | NR                                                                                                         | 19             |
| Munson JC[23]   | UK      | 1989–2006   | 1,126       | IPF patients drawn from the THIN primary care dataset  | Read codes              | NR (Hypertension or Congestive Heart Failure)                                                              | 32             |
| Kim WY[131]     | Korea   | 2005–2009   | 460         | Database of IPF patients from a Medical Center         | ATS/ERS/JRS/A LAT       | blood pressure $\geq 140/90$ mmHg, treatment with antihypertensive medication, or history by questionnaire | 35             |
| Lederer DJ[52]  | US      | 2004–2005   | 454         | IPF patients listed for lung transplantation with UNOS | NR                      | NR                                                                                                         | 15             |
| Park J*[129]    | Korea   | NR          | 324         | IPF patients admitted to a tertiary referral center    | Lung biopsy             | NR                                                                                                         | 34             |
| Papakosta       | Greece  | 2005–       | 139         | IPF patients                                           | ATS/ERS                 | NR                                                                                                         | 37             |



| Reference       | Country      | Study Years | Sample Size | Study Population                                                                             | IPF Diagnostic Criteria | Arterial Hypertension Case Ascertainment                                                                                                                                  | Prevalence (%) |
|-----------------|--------------|-------------|-------------|----------------------------------------------------------------------------------------------|-------------------------|---------------------------------------------------------------------------------------------------------------------------------------------------------------------------|----------------|
| D[41]           |              | 2006        |             | referred to 8 departments of pneumonology                                                    |                         |                                                                                                                                                                           |                |
| Sherbini N[75]  | Saudi Arabia | 2007–2012   | 134         | IPF patients' data from 2 tertiary care hospitals                                            | ATS/ERS                 | NR                                                                                                                                                                        | 39             |
| Hyldgaard C[48] | Denmark      | 2003 – 2009 | 121         | IPF patients identified from an Interstitial Lung Disease Registry at a University Hospital, | ATS/ERS/JRS/ALAT        | NR                                                                                                                                                                        | 18             |
| Kim YJ[135]     | Korea        | 2000–2006   | 114         | IPF patients admitted to a hospital                                                          | ATS/ERS                 | (1) Known arterial hypertension with treatment including antihypertensive agent, diet, exercise et al. or (2) systolic BP $\geq$ 140 mmHg, or diastolic BP $\geq$ 90 mmHg | 20             |
| Miyake Y[126]   | Japan        | 2001        | 104         | IPF patients identified across                                                               | ATS/ERS                 | Having received medication for                                                                                                                                            | 27             |

| Reference       | Country      | Study Years | Sample Size | Study Population                                                   | IPF Diagnostic Criteria | Arterial Hypertension Case Ascertainment                                                                                   | Prevalence (%) |
|-----------------|--------------|-------------|-------------|--------------------------------------------------------------------|-------------------------|----------------------------------------------------------------------------------------------------------------------------|----------------|
|                 |              |             |             | ~20 hospitals<br>IPF patients                                      |                         | arterial<br>hypertension                                                                                                   |                |
| Nadrous HF[5]   | US           | 1994–1996   | 88          | IPF patients evaluated at a tertiary care, referral medical center | ATS/ERS                 | NR                                                                                                                         | 44             |
| Rusanov V[119]  | Israel       | 2009        | 61          | IPF patients referred for lung transplantation                     | ATS/ERS                 | NR                                                                                                                         | 55             |
| Alhamad EH[130] | Saudi Arabia | 1996–2005   | 61          | IPF patients admitted to a hospital                                | ATS/ERS                 | NR                                                                                                                         | 22             |
| Enomoto T[134]  | Japan        | 1995–2000   | 52          | IPF patients admitted to a hospital                                | ATS/ERS                 | Systolic BP >140 mmHg and/or diastolic BP >90 mmHg, and/or patients had a history of treatment with antihypertensive drugs | 24             |

| Reference              | Country | Study Years | Sample Size | Study Population                                           | IPF Diagnostic Criteria | Arterial Hypertension Case Ascertainment                                          | Prevalence (%) |
|------------------------|---------|-------------|-------------|------------------------------------------------------------|-------------------------|-----------------------------------------------------------------------------------|----------------|
| Izbicki G[125]         | Israel  | 1997–2003   | 49          | IPF patients who were candidates for lung transplantation  | ATS/ERS                 | Arterial BP $\geq 140/90$ mmHg or treatment with $\geq 1$ antihypertensive agents | 14             |
| Fernandez Perez ER[28] | US      | 1997–2005   | 47          | IPF patients identified via the REP, Olmsted County, Minn. | ATS/ERS                 | NR                                                                                | 66             |
| Schomberg LEE*[127]    | UK      | 2003–2010   | 38          | Consecutive cases of IPF from a health care provider       | Radiology reports       | NR                                                                                | 71             |
| Rufino RL*[39]         | Brazil  | 2008–2010   | 36          | IPF patients referred to an outpatient clinic              | ATS/ERS                 | NR                                                                                | 44             |

Abbreviations: BP: Blood pressure; REP: Rochester Epidemiology Project; NR: Not reported; THIN: The Health Improvement Network; UNOS: United Network for Organ Sharing

**Supplementary Table S12. Prevalence of Diabetes among IPF Patients**

| Reference       | Country      | Study Period | Sample Size | Study Population                                                                             | IPF Diagnostic Criteria | Diabetes Case Ascertainment                                                                  | Prevalence (%) |
|-----------------|--------------|--------------|-------------|----------------------------------------------------------------------------------------------|-------------------------|----------------------------------------------------------------------------------------------|----------------|
| Munson JC[23]   | UK           | 1989–2006    | 1,126       | Patients with IPF identified from THIN database                                              | Read codes              | Read codes                                                                                   | 14             |
| Gribbin J[102]  | UK           | 1991–2003    | 920         | Patients with IPF identified from THIN database                                              | Read codes              | Read codes                                                                                   | 10             |
| Kim WY[131]     | Korea        | 2005 – 2009  | 460         | Medical center database of IPF patients                                                      | ATS/ERS/JR S/ALAT       | FG $\geq$ 126 mg/dL, use of oral hypoglycemic agents or insulin, or history by questionnaire | 20             |
| Park J[129]     | Korea        | NR           | 324         | IPF patients from a tertiary referral center                                                 | Lung biopsy             | NR                                                                                           | 24             |
| Kim ES[92]      | Korea        | 2005–2009    | 268         | IPF patients from a tertiary care hospital                                                   | ATS/ERS                 | NR                                                                                           | 18             |
| Papakosta D[41] | Greece       | 2005–2006    | 139         | IPF patients referred to 8 pneumonology departments                                          | ATS/ERS                 | NR                                                                                           | 18             |
| Sherbini N[75]  | Saudi Arabia | 2007–2012    | 134         | IPF patients' data from 2 tertiary care hospitals                                            | ATS/ERS                 | NR                                                                                           | 42             |
| Lamas DJ[108]   | US           | 2007–2010    | 129         | IPF patients from a tertiary care center stratified by time from symptom onset to care       | ATS/ERS                 | NR                                                                                           | 12–39          |
| Hyldgaard C[48] | Denmark      | 2003 – 2009  | 121         | IPF patients identified from an interstitial lung disease registry at a University Hospital, | ATS/ERS/JR S/ALAT       | NR                                                                                           | 17             |
| Garcia-         | Mexico       | 2007–        | 100         | Newly-diagnosed IPF                                                                          | ATS/ERS                 | Self-reported                                                                                | 30             |

| Reference                       | Country      | Study Period | Sample Size | Study Population                                               | IPF Diagnostic Criteria | Diabetes Case Ascertainment                                                                                                                                                                                                                        | Prevalence (%) |
|---------------------------------|--------------|--------------|-------------|----------------------------------------------------------------|-------------------------|----------------------------------------------------------------------------------------------------------------------------------------------------------------------------------------------------------------------------------------------------|----------------|
| Sancho C[106]                   |              | 2009         |             | patients consecutively seen at a single institution            |                         | from questionnaire                                                                                                                                                                                                                                 |                |
| Garcia-Sancho Figueroa Mac[136] | Mexico       | 2000–2005    | 97          | Records of consecutive IPF patients seen at a single institute | ATS/ERS                 | One of the following: 1) FG >126 mg/dl in the absence of corticosteroids treatment; 2) patient-reported diagnosis from physician; 3) patient received diagnosis of T2DM at clinic during first consult; 4) patient took oral T2DM drugs or insulin | 11             |
| Schomberg LEE[127] <sup>a</sup> | UK           | 2003–2010    | 96          | Consecutive IPF patients from a health care provider           | Radiology reports       | NR                                                                                                                                                                                                                                                 | 24             |
| Rusanov V[119]                  | Israel       | 2009         | 61          | Patients with IPF diagnosed referred for lung transplant       | ATS/ERS                 | NR                                                                                                                                                                                                                                                 | 27             |
| Alhamad EH[130]                 | Saudi Arabia | 1996–2005    | 61          | IPF patients at a university hospital                          | ATS/ERS                 | NR                                                                                                                                                                                                                                                 | 25             |
| Enomoto                         | Japan        | 1995–        | 52          | Patients admitted to Nippon                                    | ATS/ERS                 | FG>126 mg/dL                                                                                                                                                                                                                                       | 33             |

| Reference                  | Country | Study Period | Sample Size | Study Population                                                                                                           | IPF Diagnostic Criteria | Diabetes Case Ascertainment                                                             | Prevalence (%) |
|----------------------------|---------|--------------|-------------|----------------------------------------------------------------------------------------------------------------------------|-------------------------|-----------------------------------------------------------------------------------------|----------------|
| T[134]                     |         | 2000         |             | Medical School Hospital with IPF                                                                                           |                         | and/or HbA1c >6%, or DM therapy, including diet, exercise, and/or medication            |                |
| Izbicki G[125]             | Israel  | 1997–2003    | 49          | Patients (age >40 years old) with lung fibrosis diagnosed by ATS/ERS criteria who were candidates for lung transplantation | ATS/ERS                 | FG >126 mg/dl or treatment with one or more oral or parenteral hypoglycemic medications | 20             |
| Rufino RL[39] <sup>a</sup> | Brazil  | 2008–2010    | 36          | IPF Patients referred to an outpatient clinic at the State University of Rio de Janeiro                                    | ATS/ERS                 | NR                                                                                      | 12             |
| Lee RNC[80]                | Ireland | 2009–2012    | 20          | IPF Patients selected from a Hospital IPF database who underwent overnight PSG                                             | ATS/ERS <sup>b</sup>    | NR                                                                                      | 20             |

<sup>a</sup>Abstract

<sup>b</sup>“confirmed diagnosis of IPF by ATS criteria”

Abbreviations: DM: Diabetes mellitus; FG: fasting glucose; HbA1c: Hemoglobin A1c; NR: Not reported; T2DM: Type 2 diabetes mellitus

**Supplementary Table S13. Prevalence of Hypercholesterolemia/Hyperlipidemia among IPF Patients**

| Reference                | Country | Study Period | Sample Size | Study Population                                                           | IPF Diagnostic Criteria | Hypercholesterolemia/<br>Hyperlipidemia Case Ascertainment                                                                                                                                                                         | Prevalence (%) |
|--------------------------|---------|--------------|-------------|----------------------------------------------------------------------------|-------------------------|------------------------------------------------------------------------------------------------------------------------------------------------------------------------------------------------------------------------------------|----------------|
| Gribbin J[102]           | UK      | 1991–2003    | 920         | Patients with IPF identified using Read codes from THIN database           | Read codes              | Read codes                                                                                                                                                                                                                         | 10             |
| Kim WY[131]              | Korea   | 2005 – 2009  | 460         | Database of IPF patients from a Medical Center                             | ATS/ERS/JRS/<br>ALAT    | T-chol $\geq$ 240 mg/dL or use of lipid-lowering therapy                                                                                                                                                                           | 15             |
| Park J[129] <sup>a</sup> | Korea   | NR           | 324         | IPF patients from a tertiary referral center                               | Lung biopsy             | NR                                                                                                                                                                                                                                 | 30             |
| Kim YJ[135]              | Korea   | 2000–2006    | 114         | IPF patients diagnosed at Gil Hospital and Samsung Medical Center in Korea | ATS/ERS                 | Either (1) known hyperlipidemia with treatment with any medication for hyperlipidemia, or (2) T-chol $\geq$ 200 mg/dL and/or triglyceride $\geq$ 150 mg/dL and/or LDL cholesterol $\geq$ 100 mg/dL based on ATP III classification | 29             |
| Miyake Y[126]            | Japan   | 2001         | 104         | Patients with IPF, aged $\geq$ 40 years                                    | ATS/ERS                 | NR                                                                                                                                                                                                                                 | 10             |
| Enomoto                  | Japan   | 1995–        | 52          | IPF patients                                                               | ATS/ERS                 | T-chol $>$ 240 mg/dL                                                                                                                                                                                                               | 19             |

| Reference                       | Country | Study Period | Sample Size | Study Population                                                          | IPF Diagnostic Criteria | Hypercholesterolemia/<br>Hyperlipidemia Case Ascertainment                           | Prevalence (%) |
|---------------------------------|---------|--------------|-------------|---------------------------------------------------------------------------|-------------------------|--------------------------------------------------------------------------------------|----------------|
| T[134]                          |         | 2000         |             | admitted to Nippon Medical School Hospital                                |                         | and/or triglyceride >150 mg/d, and treatment with any medications for hyperlipidemia |                |
| Izbicki G[125]                  | Israel  | 1997–2003    | 49          | IPF Patients (age >40 years) who were candidates for lung transplantation | ATS/ERS                 | T- chol > 240 mg/dl or treatment with ≥1 lipid-lowering drug                         | 22             |
| Schomberg LEE[127] <sup>a</sup> | UK      | 2003–2010    | 38          | Consecutive cases of UIP from a healthcare provider                       | Radiology reports       | NR                                                                                   | 55             |

<sup>a</sup> Abstract

Abbreviations: ATP: Adult Treatment Panel; LDL: Low-density lipoprotein; NR: Not reported; T-chol: Total cholesterol; THIN: The Health Improvement Network



**Supplementary Table S14. Prevalence of Weight Disorders among IPF Patients**

| Reference       | Country | Study Period | Sample Size | Study Population                                                               | IPF Diagnostic Criteria | Metabolic Comorbidity Case Ascertainment | Prevalence (%) |
|-----------------|---------|--------------|-------------|--------------------------------------------------------------------------------|-------------------------|------------------------------------------|----------------|
| Collard HR[26]  | US      | 2001–2008    | 9,286       | IPF patients in Thomson Reuters MarketScan database                            | ICD-9 codes             | Obesity (ICD-9 codes)                    | 0.6            |
| Munson JC[23]   | UK      | 1989–2006    | 1,126       | IPF patients in THIN database                                                  | Read codes              | Obesity (Read codes)                     | 18             |
| Kim WY[131]     | Korea   | 2005 – 2009  | 460         | Database of IPF patients from a Medical Center                                 | ATS/ERS/JRS/A<br>LAT    | Obesity (BMI $\geq 25.0$ )               | 39             |
| Lee JS[10]      | US      | 2001–2008    | 204         | IPF patients at the University of California San Francisco and the Mayo Clinic | ATS/ERS/JRS/A<br>LAT    | Obesity (BMI $\geq 30$ )                 | 37             |
|                 |         |              |             |                                                                                |                         | Overweight (25–30)                       | 39             |
|                 |         |              |             |                                                                                |                         | Underweight (BMI <18.5)                  | 0.5            |
| Alakhras M[137] | US      | 1994–1996    | 197         | IPF patients who had been evaluated at Mayo Clinic Rochester                   | ATS/ERS                 | Obesity (BMI $\geq 30$ )                 | 34             |
|                 |         |              |             |                                                                                |                         | Overweight (BMI 25–30)                   | 43             |
| Izbicki G[125]  | Israel  | 1997–2003    | 49          | IPF patients (age >40 years old) who were candidates for lung transplantation  | ATS/ERS                 | Obesity (BMI $\geq 27.0$ )               | 33             |
| Enomoto         | Japan   | 1995–        | 52          | IPF patients                                                                   | ATS/ERS                 | Obesity                                  | 19             |

| <b>Reference</b> | <b>Country</b> | <b>Study Period</b> | <b>Sample Size</b> | <b>Study Population</b>                    | <b>IPF Diagnostic Criteria</b> | <b>Metabolic Comorbidity Case Ascertainment</b> | <b>Prevalence (%)</b> |
|------------------|----------------|---------------------|--------------------|--------------------------------------------|--------------------------------|-------------------------------------------------|-----------------------|
| T[134]           |                | 2000                |                    | admitted to Nippon Medical School Hospital |                                | (BMI >25)                                       |                       |

Abbreviations: THIN: The Health Improvement Network
